# Supplementary material
Source: PubMed Central journal article supplement (PMC5890952)
Supplement: NIHMS923472-supplement-supplement_1.pdf [file NIHMS923472-supplement-supplement_1.pdf]

**Supplementary Table 1. International Classification of Diseases, Ninth Revision, Clinical Modification (ICD-9-CM) diagnosis codes used to determine hospitalizations**

| <i>ICD-9-CM Diagnosis codes:</i>       |                                                                            |
|----------------------------------------|----------------------------------------------------------------------------|
| <b><i>Smoking</i></b>                  |                                                                            |
| 305.1X                                 | Tobacco use disorder                                                       |
| 649.0X                                 | Tobacco use disorder complicating pregnancy, childbirth, or the puerperium |
| V15.82                                 | Personal history of nicotine dependence                                    |
| <b><i>Migraine</i></b>                 |                                                                            |
| 346.XX                                 | Migraine                                                                   |
| 307.81                                 | Tension-type headache                                                      |
| 784.0X                                 | Headache                                                                   |
| 339.XX                                 | Other headache syndromes                                                   |
| <b><i>Suicidal behaviors</i></b>       |                                                                            |
| V62.84                                 | Suicidal ideation                                                          |
| E950.XX                                | Suicide and self-inflicted poisoning by solid or liquid substances         |
| E951.XX                                | Suicide and self-inflicted poisoning by gases in domestic use              |
| E952.XX                                | Suicide and self-inflicted poisoning by other gases and vapors             |
| E953.XX                                | Suicide and self-inflicted injury by hanging strangulation and suffocation |
| E954.XX                                | Suicide and self-inflicted injury by submersion [drowning]                 |
| E955.XX                                | Suicide and self-inflicted injury by firearms air guns and explosives      |
| E956.XX                                | Suicide and self-inflicted injury by cutting and piercing instrument       |
| E957.XX                                | Suicide and self-inflicted injuries by jumping from high place             |
| E958.XX                                | Suicide and self-inflicted injury by other and unspecified means           |
| E959.XX                                | Late effects of self-inflicted injury                                      |
| <b><i>Any psychiatric disorder</i></b> |                                                                            |
| <b><i>Depression</i></b>               |                                                                            |
| 296.82                                 | Atypical depressive disorder                                               |
| 301.12                                 | Chronic depressive personality disorder                                    |
| 309.28                                 | Chronic depressive personality disorder                                    |
| 296.2X                                 | Major depressive disorder, single episode                                  |
| 296.3X                                 | Major depressive disorder, recurrent episode                               |
| 300.4X                                 | Dysthymic disorder                                                         |
| 309.0X                                 | Dysthymic disorder                                                         |
| 309.1X                                 | Prolonged depressive reaction                                              |
| 311.XX                                 | Depressive disorder, not elsewhere classified                              |

| <i>Anxiety</i>                    |                                                                     |
|-----------------------------------|---------------------------------------------------------------------|
| 300.00                            | Anxiety state not otherwise specified                               |
| 300.01                            | Panic disorder without agoraphobia                                  |
| 300.02                            | Generalized anxiety disorder                                        |
| 300.21                            | Agoraphobia with panic disorder                                     |
| 300.22                            | Agoraphobia without mention of panic attacks                        |
| 300.23                            | Social phobia                                                       |
| 300.29                            | Other isolated or specific phobias                                  |
| 309.21                            | Separation anxiety                                                  |
| 300.81                            | Somatization disorder                                               |
| 300.2X                            | Phobic disorders                                                    |
| 300.3X                            | Obsessive-compulsive disorders                                      |
| 300.7X                            | Hypochondriasis                                                     |
| 308.2X                            | Predominant psychomotor disturbance                                 |
| 308.3X                            | Other acute reactions to stress                                     |
| 309.81                            | Post-traumatic stress disorder                                      |
| <i>Alcohol or substance abuse</i> |                                                                     |
| 291.XX                            | Alcohol-induced mental disorder                                     |
| 292.XX                            | Drug-induced mental disorders                                       |
| 303.XX                            | Alcohol dependence syndrome                                         |
| 304.XX                            | Drug dependence                                                     |
| 305.XX                            | Nondependent abuse of drugs                                         |
| 648.3X                            | Drug dependence complicating pregnancy childbirth or the puerperium |
| 655.5X                            | Suspected damage to fetus from drugs affecting management of mother |
| 965.0X                            | Poisoning by opiates and related narcotics                          |
| V65.42                            | Counseling on substance use and abuse                               |
| <i>Psychosis</i>                  |                                                                     |
| 295.XX                            | Schizophrenic disorders                                             |
| 296.XX                            | Episodic mood disorders                                             |
| 297.XX                            | Delusional disorders                                                |
| 298.XX                            | Other nonorganic psychoses                                          |

**Supplementary Table 2. Characteristics of hospitals where participants with and without migraine-related hospitalizations being hospitalized (N = 156,172,826)**

| Characteristics          | All<br>(N = 156,172,826) |      | With migraine<br>(N = 2,190,305) |      | Without migraine<br>(N = 153,982,521) |      | P-value |
|--------------------------|--------------------------|------|----------------------------------|------|---------------------------------------|------|---------|
|                          | N                        | %    | N                                | %    | N                                     | %    |         |
| <b>Region</b>            |                          |      |                                  |      |                                       |      |         |
| Northeast                | 31,018,096               | 19.9 | 407,070                          | 18.6 | 30,611,026                            | 19.9 | 0.02    |
| Midwest                  | 36,121,732               | 23.1 | 545,882                          | 24.9 | 35,575,850                            | 23.1 |         |
| South                    | 59,598,005               | 38.2 | 827,541                          | 37.8 | 58,770,464                            | 38.2 |         |
| West                     | 29,434,993               | 18.8 | 409,811                          | 18.7 | 29,025,181                            | 18.8 |         |
| <b>Location</b>          |                          |      |                                  |      |                                       |      |         |
| Rural                    | 19,283,301               | 12.3 | 220,129                          | 10.1 | 19,063,171                            | 12.4 | <0.0001 |
| Urban                    | 135,502,432              | 86.8 | 1,950,012                        | 89.0 | 133,552,420                           | 86.7 |         |
| <b>Bed size</b>          |                          |      |                                  |      |                                       |      |         |
| Small                    | 18,463,658               | 11.8 | 238,527                          | 10.9 | 18,225,132                            | 11.8 | 0.03    |
| Medium                   | 37,493,405               | 24.0 | 506,586                          | 23.1 | 36,986,819                            | 24.0 |         |
| Large                    | 98,828,669               | 63.3 | 1,425,029                        | 65.1 | 97,403,640                            | 63.3 |         |
| <b>Teaching hospital</b> | 69,905,002               | 44.8 | 1,040,536                        | 47.5 | 68,864,466                            | 44.7 | <0.0001 |

Rounded components may not add up to the rounded sum due to weighting and rounding.

Percentages may not add up to 100% due to rounding or missing data.

**Supplementary Table 3. Association between migraine and suicidal behaviors by age groups (N = 156,172,826)**

| Migraine                                  | With migraine<br>(N = 2,190,305) | Without migraine<br>(N = 153,982,521) | OR (95% CI)          |                       |
|-------------------------------------------|----------------------------------|---------------------------------------|----------------------|-----------------------|
|                                           |                                  |                                       | Unadjusted           | Adjusted <sup>a</sup> |
| <b>All participants (N = 156,172,826)</b> |                                  |                                       |                      |                       |
| < 50                                      |                                  |                                       |                      |                       |
| No suicidal behavior                      | 1,195,495                        | 53,510,653                            | Reference            | Reference             |
| Suicidal behavior                         | 73,528                           | 1,798,906                             | 1.83 (1.73,<br>1.93) | 2.01 (1.91,<br>2.12)  |
| ≥ 50                                      |                                  |                                       |                      |                       |
| No suicidal behavior                      | 902,312                          | 97,994,514                            | Reference            | Reference             |
| Suicidal behavior                         | 18,969                           | 678,449                               | 3.04 (2.79,<br>3.31) | 1.66 (1.52, 1.80)     |
| <b>Male (N = 62,465,446)</b>              |                                  |                                       |                      |                       |
| < 50                                      |                                  |                                       |                      |                       |
| No suicidal behavior                      | 183,131                          | 15,669,431                            | Reference            | Reference             |
| Suicidal behavior                         | 13,468                           | 891,103                               | 1.29 (1.19,<br>1.40) | 1.20 (1.10,<br>1.30)  |
| ≥ 50                                      |                                  |                                       |                      |                       |
| No suicidal behavior                      | 172,663                          | 45,186,670                            | Reference            | Reference             |
| Suicidal behavior                         | 3,745                            | 345,236                               | 2.84 (2.41,<br>3.35) | 1.68 (1.43, 1.98)     |
| <b>Female (N = 93,512,367)</b>            |                                  |                                       |                      |                       |
| < 50                                      |                                  |                                       |                      |                       |
| No suicidal behavior                      | 1,011,484                        | 37,682,579                            | Reference            | Reference             |
| Suicidal behavior                         | 60,056                           | 906,884                               | 2.47 (2.34,<br>2.61) | 2.25 (2.13,<br>2.37)  |
| ≥ 50                                      |                                  |                                       |                      |                       |
| No suicidal behavior                      | 729,520                          | 52,773,489                            | Reference            | Reference             |
| Suicidal behavior                         | 152,24                           | 333,131                               | 3.31 (3.07,<br>3.56) | 1.60 (1.48,<br>1.72)  |

Abbreviations: OR, odds ratio; CI, confidence interval  
<sup>a</sup> Adjusted for age (continuous), sex, race, median household income quartiles for patient zip code, hospital location, hospital region, year, and

age-adjusted Charlson Comorbidity Index.
